# Supplementary material
Source: publisher figshare collection journal article supplement (https://acs.figshare.com/ndownloader/files/5012107)
Supplement: Supplementary file 1 [file 5012107]

## Supporting Information

### ***Unprecedented binding mode of hydroxamate-based inhibitors of glutamate carboxypeptidase II: structural characterization and biological activity***

Zora Novakova,<sup>1</sup> Krystyna Wozniak,<sup>2</sup> Andrej Jancarik,<sup>6</sup> Rana Rais,<sup>2,3</sup> Ying Wu,<sup>2</sup> Jiri Pavlicek,<sup>1</sup> Dana Ferraris,<sup>7</sup> Barbora Havlinova,<sup>1</sup> Jakub Ptacek,<sup>1</sup> Jan Vavra,<sup>6</sup> Niyada Hin,<sup>2</sup> Camilo Rojas,<sup>2</sup> Pavel Majer,<sup>6</sup> Barbara S. Slusher,<sup>2,3,4,5\*</sup> Takashi Tsukamoto,<sup>2,3\*</sup> and Cyril Barinka<sup>1\*</sup>

#### **Table of Contents of SI**

|                                                                   |          |
|-------------------------------------------------------------------|----------|
| Supporting Figure S1                                              | page S2  |
| Supporting Figure S2                                              | page S4  |
| Supporting Figure S3                                              | page S5  |
| Supporting Figure S4                                              | page S6  |
| Supporting Figure S5                                              | page S7  |
| Supporting Figure S6                                              | page S8  |
| Supporting Figure S7                                              | page S9  |
| Supporting Figure S8                                              | page S10 |
| Supporting Materials and Methods including Supplementary Scheme 1 | page S11 |

### Supporting Figure S1: Chiral separation of (*R*)-1 and (*S*)-1

(*R,S*)-1 was resolved into individual enantiomers by HPLC on a Eurocel 01 column (250 × 4.6 mm, 5 µm, Knauer) using an instrument consisting of an isocratic HPLC pump (Knauer Smartline 1000), a variable-wavelength UV detector set at 254 nm (Knauer Smartline 2500), a polarimetric detector (Chiralyser LED 426 nm, IBZ Messtechnik) and a PC workstation with Clarity software (Dataapex). n-Heptane-ethanol (2:1) was used as a mobile phase at a flow rate of 1.0 ml/min. For analyses, the samples were dissolved in HPLC ethanol (ca 1 mg/ml) and filtered through a 0.45 µm PTFE syringe filter before injection (ca 1 µl). Concentrations of samples for preparative separations were 10 mg/ml of the racemate for each run (injection 1 ml). Column for preparative separations was Eurocel 01 (270 x 25 mm, 5 µm, Knauer).

HPLC (Eurocel 01 column) of racemic hydroxamic acid (red: UV detector, blue: downstream polarimetric detector):

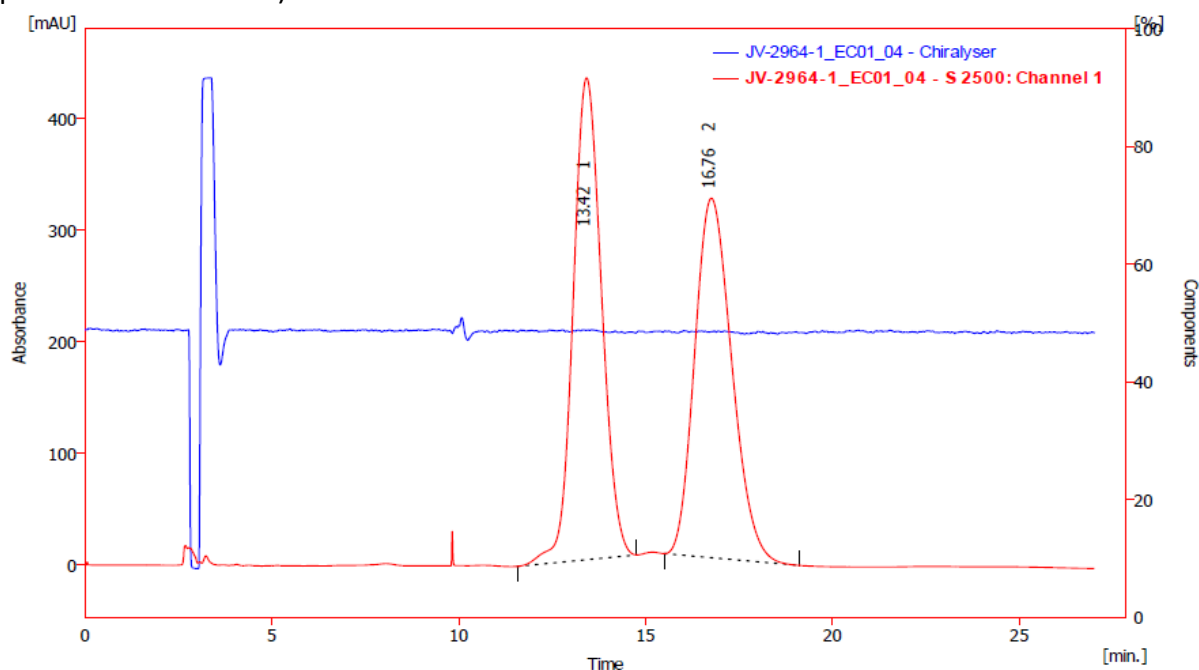

Result Table (Uncal - JV-2964-1\_EC01\_04 - S 2500: Channel 1)

|   | Reten. Time<br>[min] | Area<br>[mAU.s] | Height<br>[mAU] | Area<br>[%] | Height<br>[%] | W05<br>[min] | Compound<br>Name |
|---|----------------------|-----------------|-----------------|-------------|---------------|--------------|------------------|
| 1 | 13.423               | 22817.400       | 431.629         | 50.66       | 57.3          | 0.82         |                  |
| 2 | 16.763               | 22218.928       | 322.055         | 49.34       | 42.7          | 1.08         |                  |
|   | Total                | 45036.328       | 753.684         | 100.00      | 100.0         |              |                  |

HPLC (Eurocel 01 column) of pure enantiomers of tribenzyl esters (***R,S***)-**1** (red: UV detector) after chiral HPLC semipreparative resolution.

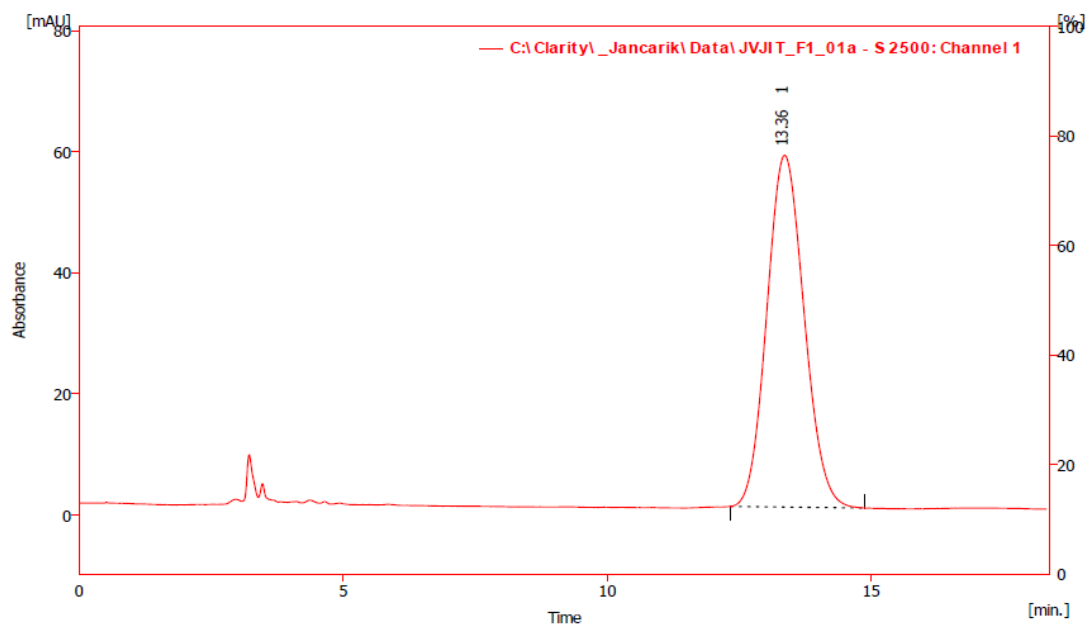

Result Table (Uncal - C:\Clarity\_Jancarik\Data\JVJIT\_F1\_01a - S 2500: Channel 1)  
Drift (11.59-14.51 min.): 10.5028 [mAU/h]

|   | Reten. Time<br>[min] | Area<br>[mAU.s] | Height<br>[mAU] | Area<br>[%] | Height<br>[%] | W05<br>[min] | Compound<br>Name |
|---|----------------------|-----------------|-----------------|-------------|---------------|--------------|------------------|
| 1 | 13.357               | 2850.491        | 58.067          | 100.0       | 100.0         | 0.77         |                  |
|   | Total                | 2850.491        | 58.067          | 100.0       | 100.0         |              |                  |

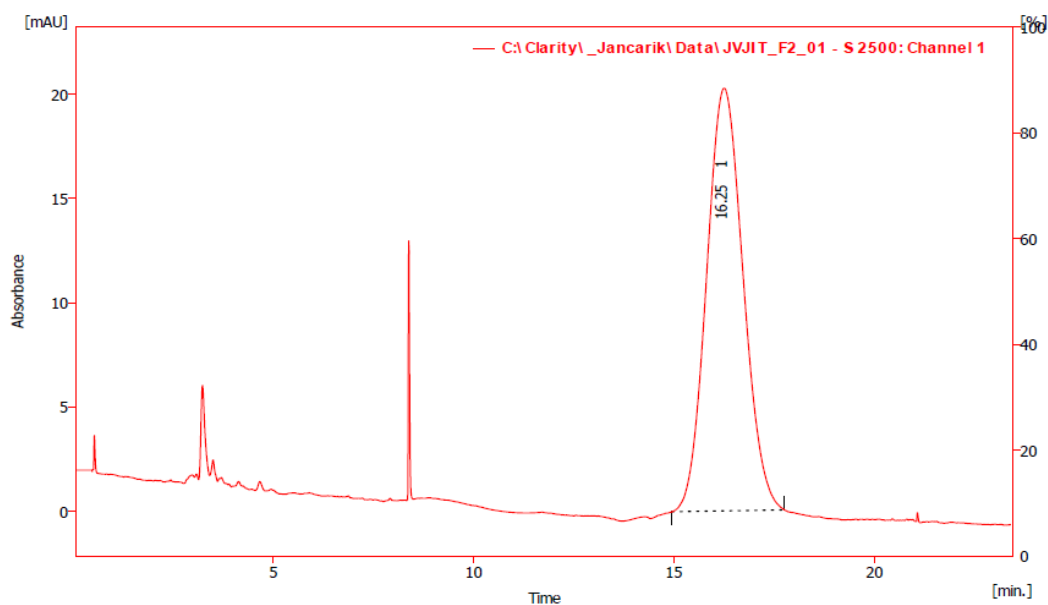

Result Table (Uncal - C:\Clarity\_Jancarik\Data\JVJIT\_F2\_01 - S 2500: Channel 1)

|   | Reten. Time<br>[min] | Area<br>[mAU.s] | Height<br>[mAU] | Area<br>[%] | Height<br>[%] | W05<br>[min] | Compound<br>Name |
|---|----------------------|-----------------|-----------------|-------------|---------------|--------------|------------------|
| 1 | 16.250               | 1285.239        | 20.268          | 100.0       | 100.0         | 0.99         |                  |
|   | Total                | 1285.239        | 20.268          | 100.0       | 100.0         |              |                  |

## Supporting Figure S2: GCPII/inhibitor distances

The table shows intermolecular distances between (*S*)-1, (*R*)-1 and GCPII atoms within the 4 Å radius. Nomenclature of inhibitor atoms is shown in the accompanying formula.

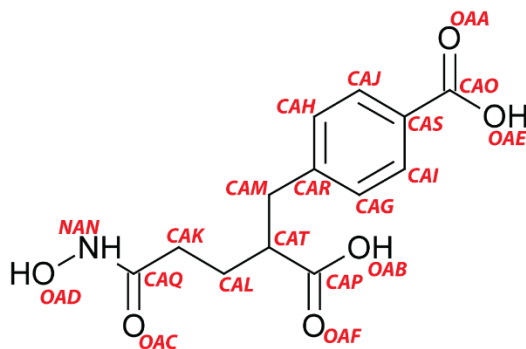

### (*R*)-1

| inhibitor atom name | distance [Å] | protein atom name | inhibitor atom name | distance [Å] | protein atom name |
|---------------------|--------------|-------------------|---------------------|--------------|-------------------|
| OAE                 | 2.5          | Tyr234-OH         | CAL                 | 3.6          | Tyr552-OH         |
|                     | 3.6          | Tyr234-CZ         | CAK                 | 3.6          | Tyr552-OH         |
|                     | 3.8          | Tyr234-CE2        |                     | 3.4          | Gly518-O          |
|                     | 3.9          | Tyr552-CD2        |                     | 2.8          | Act1-CH3          |
|                     | 4.0          | Tyr552-CE2        |                     | 3.6          | Act1-C            |
|                     | 3.2          | HOH2111           |                     | 4.0          | Act1-OXT          |
| OAA                 | 3.5          | Tyr234-OH         | CAQ                 | 3.9          | Asp387-OD2        |
|                     | 3.8          | Tyr234-CZ         |                     | 3.3          | Act1-CH3          |
|                     | 3.2          | Tyr234-CE2        |                     | 3.4          | Act1-C            |
|                     | 3.5          | Gly548-N          |                     | 3.4          | Act1-OXT          |
|                     | 3.2          | Gly548-CA         | OAC                 | 3.3          | Tyr552-CE1        |
|                     | 3.8          | Gly548-C          |                     | 3.4          | Tyr552-CZ         |
|                     | 3.6          | Tyr549-N          |                     | 2.7          | Tyr552-OH         |
|                     | 3.6          | Tyr552-CB         |                     | 3.9          | Act1-O            |
|                     | 3.4          | Tyr552-CG         |                     | 3.4          | Act1-C            |
|                     | 3.0          | Tyr552-CD2        |                     | 3.4          | Act1-OXT          |
|                     | 3.7          | Tyr552-CE2        |                     | 3.7          | Act1-CH3          |
| CAO                 | 3.4          | Tyr234-OH         |                     | 3.7          | Glu425-OE1        |
|                     | 3.9          | Tyr234-CE2        |                     | 3.2          | Asp387-OD2        |
|                     | 3.6          | Gly548-N          |                     | 3.0          | His553-NE2        |
|                     | 3.6          | Gly548-CA         |                     | 3.3          | His553-CE1        |
|                     | 3.3          | Tyr552-CD2        |                     | 2.1          | Zn1751 (Zn1)      |
|                     | 3.5          | Tyr234-CE2        | NAN                 | 3.6          | Asn519-ND2        |
| CAS                 | 3.9          | Gly548-N          |                     | 3.9          | Glu425-OE1        |
|                     | 3.6          | Gly548-CA         |                     | 3.7          | Act1-OXT          |
|                     | 3.8          | Tyr234-CZ         |                     | 3.4          | Asp453-OD2        |
|                     | 3.5          | Tyr234-CE2        |                     | 2.8          | Glu424-OE2        |
|                     | 3.7          | Tyr552-CD2        |                     | 3.4          | Glu424-CD         |
| CAJ                 | 3.8          | Tyr552-CG         |                     | 3.2          | Glu424-OE1        |
|                     | 3.7          | Tyr552-CD2        |                     | 3.1          | HOH2449           |
|                     | 3.6          | Tyr552-CE2        |                     | 3.0          | Zn1751 (Zn1)      |
|                     | 3.6          | Tyr234-CZ         | OAD                 | 3.1          | Glu424-OE2        |
|                     | 3.7          | Tyr552-CE1        |                     | 3.2          | Glu424-CD         |
|                     | 3.8          | Tyr552-CD1        |                     | 2.7          | Glu424-OE1        |
|                     | 3.4          | Gly548-CA         |                     | 3.9          | His377-CD2        |
| CAH                 | 3.9          | Tyr234-CZ         |                     | 3.0          | His377-NE2        |
|                     | 3.9          | Tyr552-CE1        |                     | 3.7          | His377-CE1        |
| CAM                 | 3.6          | Arg536-NH2        |                     | 3.2          | Asp453-OD2        |
| CAP                 | 4.0          | Arg536-NH2        |                     | 3.3          | Asp387-OD1        |
|                     | 3.6          | Arg534-NH1        |                     | 3.7          | Asp387-CG         |
|                     | 3.6          | Arg534-NH2        |                     | 3.3          | Asp387-OD2        |
|                     | 3.8          | Asn519-ND2        |                     | 3.0          | Glu425-OE2        |
| OAB                 | 3.9          | Arg536-NH2        |                     | 3.4          | Glu425-CD         |
|                     | 3.0          | Arg534-NH1        |                     | 3.3          | Glu425-OE1        |
|                     | 3.8          | Arg534-CZ         |                     | 2.8          | HOH2449           |
|                     | 3.7          | Arg534-NH2        |                     | 2.3          | Zn1751 (Zn1)      |
| OAF                 | 3.6          | Arg534-NH1        |                     | 2.0          | Zn1752 (Zn2)      |
|                     | 3.6          | Arg534-CZ         |                     |              |                   |
|                     | 2.8          | Arg534-NH2        |                     |              |                   |
|                     | 2.9          | Asn519-ND2        |                     |              |                   |
|                     | 3.9          | Asn519-CG         |                     |              |                   |
|                     | 2.8          | HOH2434           |                     |              |                   |

### (*S*)-1

| inhibitor atom name | distance [Å] | protein atom name | inhibitor atom name | distance [Å] | protein atom name |
|---------------------|--------------|-------------------|---------------------|--------------|-------------------|
| OAE                 | 2.7          | Tyr234-OH         | CAT                 | 3.7          | HOH2072           |
|                     | 3.7          | Tyr234-CZ         | CAL                 | 3.9          | Tyr700-OH         |
|                     | 3.9          | Tyr234-CE2        |                     | 3.8          | Tyr700-CZ         |
|                     | 3.9          | Tyr552-CD2        |                     | 3.7          | Tyr700-CE1        |
|                     | 3.0          | HOH1828           |                     | 3.6          | Tyr552-OH         |
| OAA                 | 3.3          | Tyr234-CE2        |                     | 4.0          | HOH1919           |
|                     | 4.0          | Tyr234-CZ         |                     |              |                   |
|                     | 3.6          | Tyr234-OH         | CAK                 | 3.4          | Act2140-O         |
|                     | 3.4          | Gly548-CA         |                     | 3.7          | Act2140-CH3       |
|                     | 3.9          | Gly548-C          |                     | 3.6          | Act2140-C         |
|                     | 3.9          | Gly548-N          |                     | 3.4          | Gly518-O          |
|                     | 3.5          | Tyr552-CG         |                     | 4.0          | Tyr700-CE1        |
|                     | 3.2          | Tyr552-CD2        |                     | 3.8          | Tyr552-OH         |
|                     | 4.0          | Tyr552-CE2        | CAQ                 | 3.4          | Act2140-CH3       |
|                     | 3.6          | Tyr552-CB         |                     | 3.6          | Act2140-C         |
|                     | 3.8          | Tyr549-O          |                     | 3.9          | Act2140-O         |
|                     | 3.5          | Tyr549-N          |                     | 3.5          | Tyr552-OH         |
| CAO                 | 3.3          | Tyr552-CD2        |                     | 3.9          | Glu424-OE2        |
|                     | 3.9          | Tyr552-CG         |                     | 2.9          | Zn1751 (Zn1)      |
|                     | 3.6          | Tyr552-CE2        |                     | 3.8          | Zn1752 (Zn2)      |
|                     | 3.8          | Gly548-CA         |                     | 3.2          | HOH2072           |
|                     | 3.5          | Tyr234-OH         |                     | 3.9          | Asp387-OD2        |
|                     | 4.0          | Tyr234-CE2        | OAC                 | 2.7          | Tyr552-OH         |
| CAS                 | 3.6          | Tyr552-CD2        |                     | 3.4          | Tyr552-CZ         |
|                     | 3.5          | Tyr552-CE2        |                     | 3.2          | Tyr552-CE1        |
|                     | 3.8          | Tyr552-CZ         |                     | 3.3          | His553-CE1        |
|                     | 4.0          | Tyr552-CG         |                     | 2.9          | His553-NE2        |
|                     | 3.8          | Gly548-CA         |                     | 3.2          | Asp387-OD2        |
| CAJ                 | 3.5          | Tyr552-CG         |                     | 2.1          | Zn1751 (Zn1)      |
|                     | 3.5          | Tyr552-CD1        |                     | 3.5          | HOH2072           |
|                     | 3.6          | Tyr552-CE1        |                     | 3.6          | Glu425-OE1        |
|                     | 3.7          | Tyr552-CD2        |                     | 3.7          | Act2140-CH3       |
|                     | 3.8          | Tyr552-CZ         |                     | 3.7          | Act2140-C         |
|                     | 3.6          | Gly548-CA         |                     | 3.8          | Act2140-O         |
| CAH                 | 3.9          | Tyr552-CZ         | NAN                 | 2.8          | Glu424-OE2        |
|                     | 3.6          | Tyr552-CE1        |                     | 3.4          | Glu424-CD         |
|                     | 3.8          | Tyr552-CD1        |                     | 3.2          | Glu424-OE1        |
| CAL                 | 3.9          | Tyr700-OH         |                     | 3.4          | Asp453-OD2        |
|                     | 3.7          | Tyr700-CE1        |                     | 3.0          | Zn1751 (Zn1)      |
| CAI                 | 3.9          | Tyr552-CE2        |                     | 2.9          | Zn1752 (Zn2)      |
|                     | 3.7          | Tyr700-CE2        |                     | 2.9          | HOH2072           |
| CAG                 | 3.5          | Tyr700-CE2        |                     | 3.7          | Asn519-ND2        |
|                     | 3.9          | Tyr700-CZ         |                     | 3.9          | Glu425-OE1        |
|                     | 3.9          | Tyr700-CD2        |                     | 3.9          | Asp387-OD2        |
| OAB                 | 3.0          | Arg534-NH2        |                     | 3.6          | Act2140-CH3       |
|                     | 3.6          | Arg534-NH1        | OAD                 | 3.2          | Glu424-OE2        |
|                     | 3.8          | Arg534-CZ         |                     | 3.3          | Glu424-CD         |
|                     | 3.1          | Asn519-ND2        |                     | 2.8          | Glu424-OE1        |
|                     | 2.6          | HOH1919           |                     | 3.0          | His377-NE2        |
| CAP                 | 3.3          | Asn519-ND2        |                     | 3.6          | His377-CE1        |
|                     | 3.9          | Arg536-NH1-B      |                     | 3.9          | His377-CD2        |
|                     | 3.5          | Arg534-NH2        |                     | 3.3          | Glu425-OE1        |
|                     | 3.7          | HOH1919           |                     | 3.4          | Glu425-CD         |
|                     | 3.5          | HOH2072           |                     | 3.0          | Glu425-OE2        |
| OAF                 | 3.2          | Asn519-ND2        |                     | 3.1          | Asp387-OD2        |
|                     | 3.4          | Arg534-NH2        |                     | 3.2          | Asp387-OD1        |
|                     | 1.9          | Arg536-NH1-B      |                     | 3.5          | Asp387-CG         |
|                     | 2.8          | HOH2072           |                     | 2.2          | Zn1751 (Zn1)      |
|                     | 3.5          | Asp453-OD2        |                     | 1.9          | Zn1752 (Zn2)      |
|                     | 4.0          | Asp453-CG         |                     | 3.2          | Asp453-OD2        |
|                     |              |                   |                     | 2.6          | HOH2072           |

**Supporting Figure S3: Interaction pattern in the vicinity of active-site zincs.**

Comparison of the zinc coordination sphere for hydroxamates (**panel a**), phosphorus-based (**panel b**) and urea-based (**panel c**) inhibitors. Coordination covalent bonds between the ZBGs and zinc ions (orange spheres) are shown as broken lines.

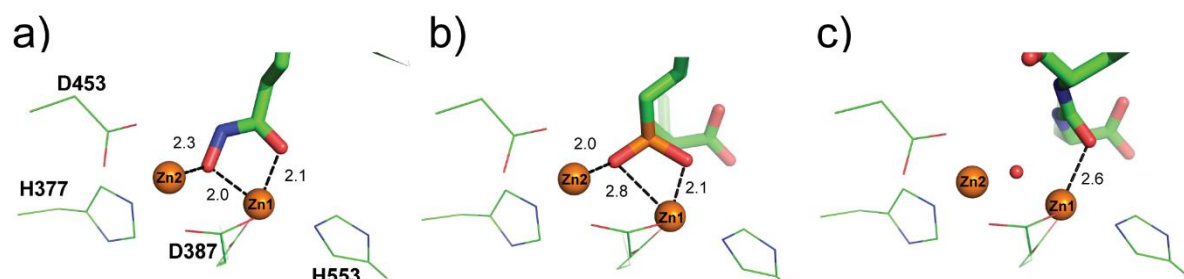

**Supporting Figure S4: Superposition of (*R*)-1 and (*S*)-1 in the internal cavity of GCPII.**

Complexes of GCPII/(*R*)-1 and GCPII/(*S*)-1 were superimposed on corresponding C $\alpha$  atoms of the enzyme and stereo representation is shown (A). Inhibitors are in stick representation and GCPII residues are shown as lines, with atoms colored red (oxygen), blue (nitrogen), and yellow and green (carbons) for (*R*)-1 and (*S*)-1, respectively. The zinc ions are shown as orange spheres. Polar interactions between inhibitor and enzyme are shown for both enantiomers (dashed lines with colors corresponding to carbon atoms). Hydrogen-bound waters are shown by yellow and green spheres. Individual enantiomers are shown in panel B – (*S*)-1 and C – (*R*)-1. Notice that stereochemistry at the chiral center has limited impact on the overall binding mode of studied hydroxamates and this finding is in line with virtually identical inhibition constants for both enantiomers.

**A**

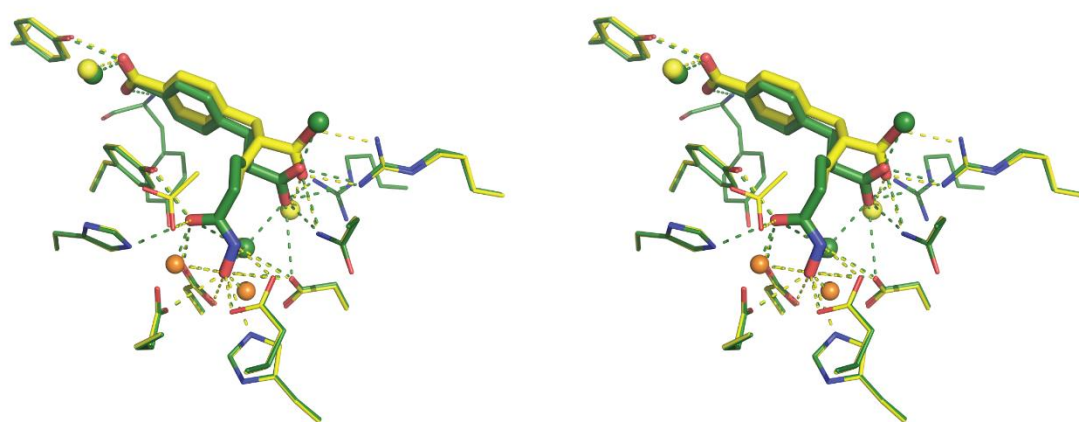

**B**

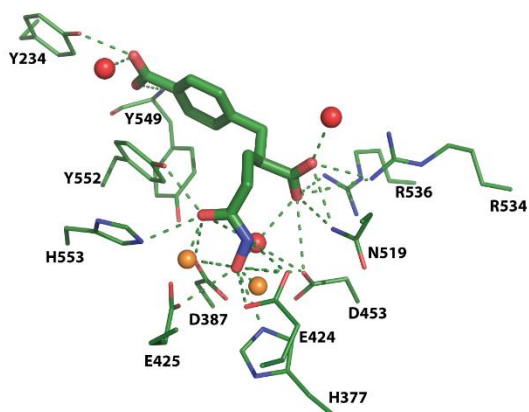

**C**

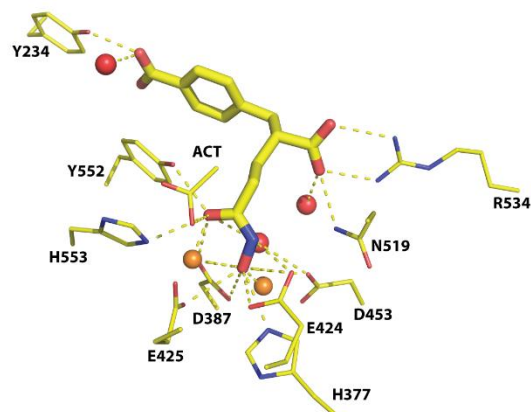

### Supporting Figure S5: Inhibitory potency of hydroxamate-based compounds and (*R,S*)-19.

Inhibition curves were determined using the fluorescence polarization method as described previously.<sup>1</sup> While (*S*)-1, (*R*)-1 and (*R,S*)-1 exhibit expected inhibition profile, none of remaining hydroxamate-based compounds (SAHA, TSA, acetohydroxamic acid) revealed any inhibition. These data indicate that the hydroxamate group alone is not sufficient for effective binding into the GCPII active site. Furthermore, the (*R,S*)-19, in which the hydroxamate ZBG is substituted by a carboxylate functionality with much weaker zinc-chelating properties, also failed to inhibit GCPII in the concentration range tested. The absence of GCPII inhibition by (*R,S*)-19 implies that the synergy between the hydroxamate group and the S1 targeting moiety is indispensable for efficient inhibition.

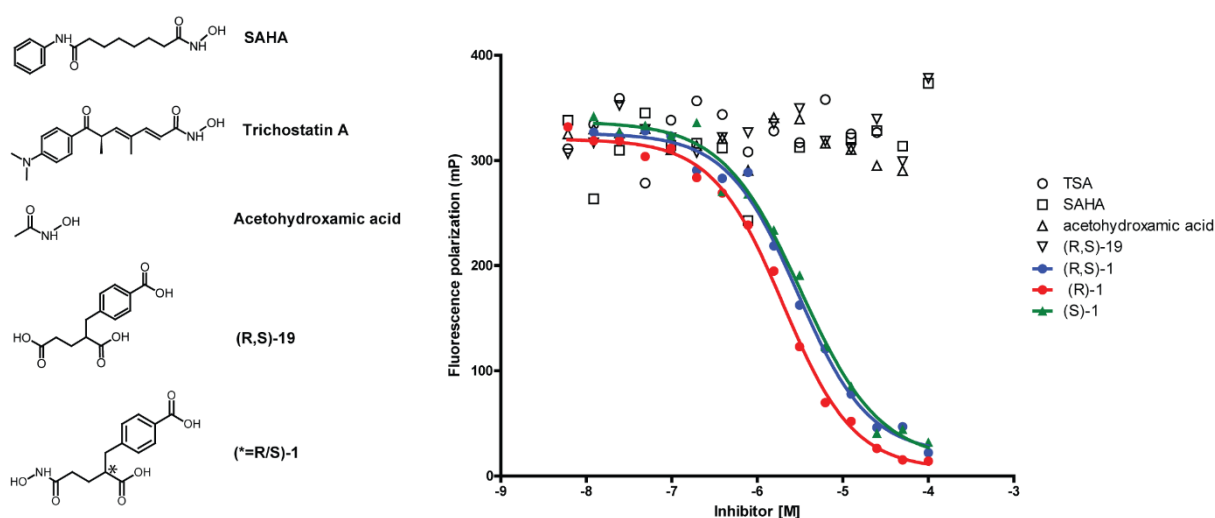

**Supporting Figure S6: Inhibitory profiles of (S)-1, (R)-1 and (R,S)-1 for human GCP3.**

Inhibition curves determined by the radioenzymatic assay as described for GCPII (see main text for details). Corresponding  $IC_{50}$  values are 165 nM, 51 nM, and 70 nM for (R)-1, (S)-1, and (R,S)-1, respectively.

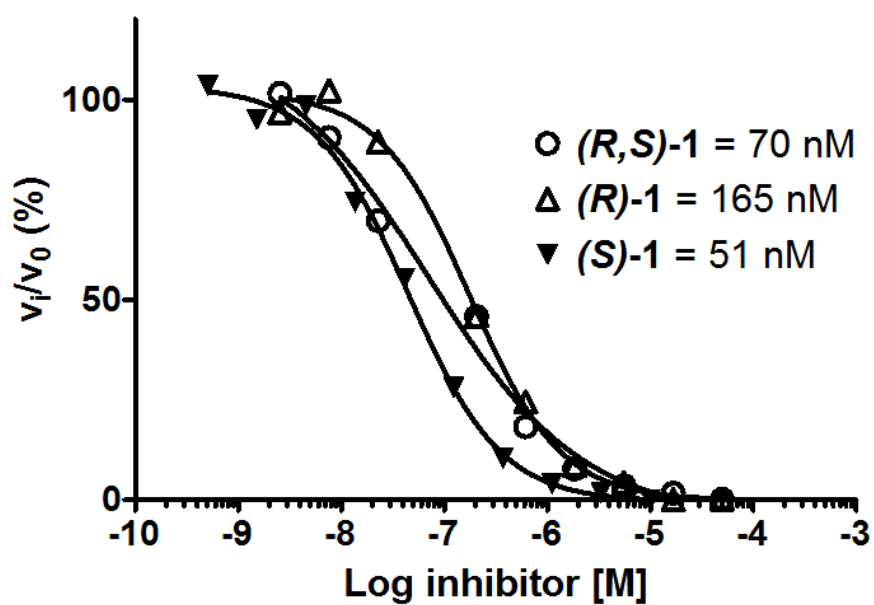



**Supporting Figure S7: Superposition of GCPII and GCP3 highlighting residues of the S1 pocket interacting with (S)-1.**

GCPII/(S)-1 complex and GCP3 (pdb code 3FEE) were superimposed on corresponding C $\alpha$  atoms. (S)-1 is shown in stick representation and GCPII residues interacting with the inhibitor are depicted in line representation (numbered according to GCPII). Atoms are colored by element – carbon is green and orange for GCPII and GCP3, respectively, oxygen is red, nitrogen is blue, zincs are shown as orange spheres and chlorine ion as magenta sphere. Notice the structural overlap between corresponding residues of GCPII/GCP3 implicated in interactions with (S)-1. This observation is in line with virtually identical inhibition constants of (S)-1 for both paralogs.

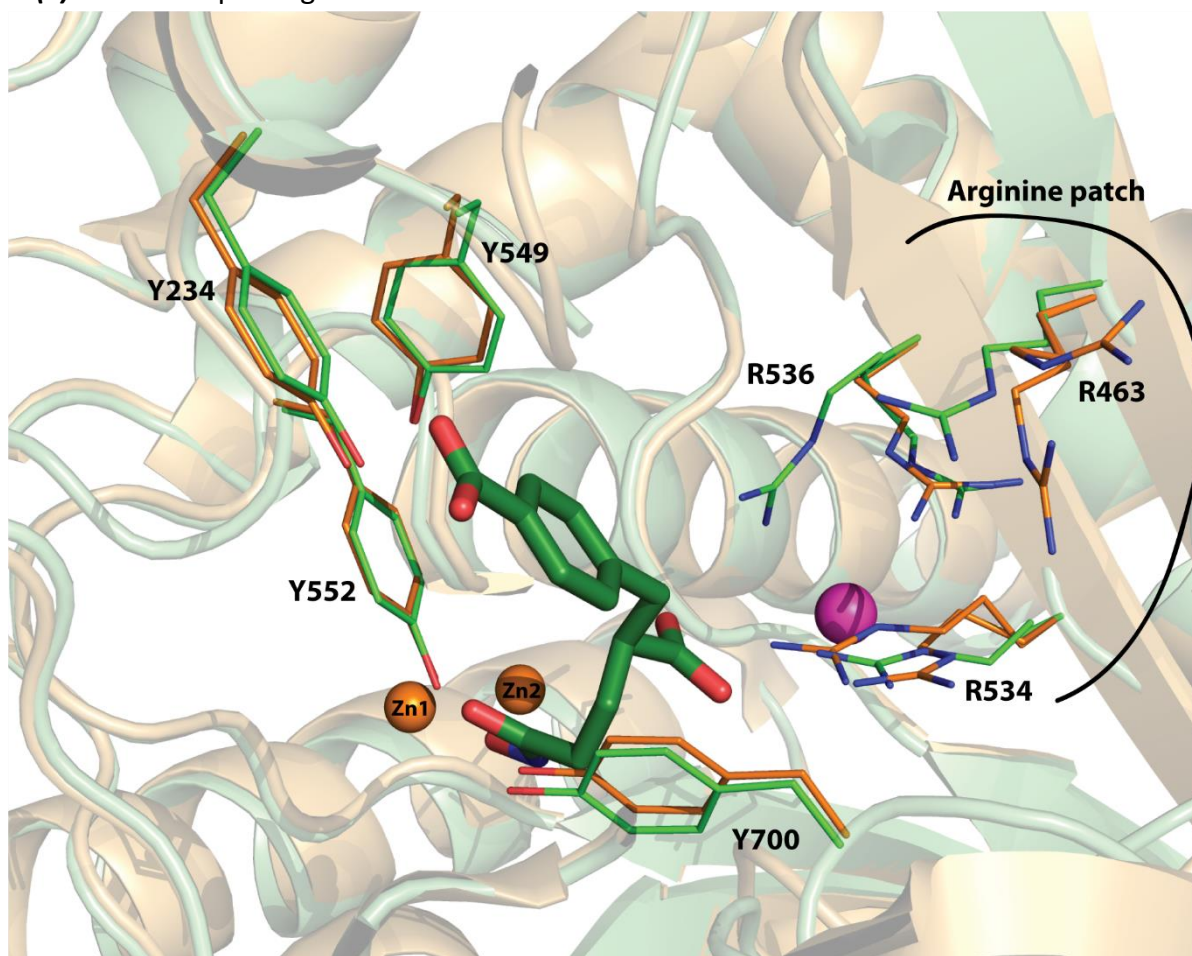

## Supporting Figure S8: Sequence alignment of human GCPII and GCP3.

The alignment was done using Clustal W (1.83) software. Amino acid numbering is based on the GCPII sequence. Residues forming S1' and S1 pockets are marked with red and green dots, respectively.

```

GCPII      53 TPKHNMK--AFLDELKAENIKKFLYNFTQIPHLAGTEQNFQLAKQIQSQW
GCP3       40 VRYHQSIRWKLVSSEMKAENIKSFLRSFTKLPHLAGTEQNFLAKKIQTQW
      .  *:          :. *:*****. ** .*: :***** ***:**:*

GCPII     101 KEFGLDSVELAHYDVLLSYPNKTHPNYISIINEDGNEIFNTSLFEPPPP
GCP3      90 KKFGLDSAKLVHYDVLLSYPNETNANYISIVDEHETEIFKTSYLEPPPDG
      *:*****. *:*****:*. :*****:*. .***:* :*** *

GCPII     151 YENVSDIVPPFSAFSPQGMPEGDLVYVNYARTEDFFKLERDMKINCSGKI
GCP3     140 YENVTNIVPPYNAFSAQGMPEGDLVYVNYARTEDFFKLEREMGINCTGKI
      *****:*****.***.*****:*****:*. * **:*

GCPII     201 VIARYGKVF●●RGNKVKNAQLAGAKGVILYSDPADYFAPGVKSYPDGWNLP
GCP3     190 VIARYGKIFRGNKVKNA●●LAGAIGIILYSDPADYFAPEVQPYKGNLPG
      *****:***** ***:*.*****:*. :*.*****

GCPII     251 GGVQ●RGNILNLNGAGDPLTPGYPA●NEYAYRRGIAEAVGLPSIPVHPIGYY
GCP3     240 TAAQ●RGNVLNLNGAGDPLTPGYPAKEYTFRLDVEEGVGIPRIPVHPIGYN
      .*****:*****:*****:*. :*. :*.***:*****

GCPII     301 DAQKLEKMGGSAPPDSSWRGSLKVPYNVGPFGFTGNFSTQKVKMHIHSTN
GCP3     290 DAEILLRYLGGIAPPDKSWKGALNVSYSIGPGFTGSDSFRKVRMHVYNIN
      **: *. :** ****.***:*. :*.*****. * :*:***:.. *

GCPII     351 EVTRIYNVIGTLRGAVEPDRYVILGGHRDSWVFGGIDPQSGAAVVHEIVR
GCP3     340 KITRIYNVVG●●TIRGSVEPDRYVILGGHRDSWVFGAIDPTSGVAVLQEIAR
      :*****:*. :*.*****:*****.*** **.**:***.

GCPII     401 SFGTLKKEGWRPRRTILFASWDAEEF●●●LLGSTEWAEENSRLQ●●ERGVAI
GCP3     390 SFGKLMSKGWRPRRTIIFASWDAEEFLLGSTEWAEENVKILQ●●ERSIAYI
      ***.* :*****:*****:***** :*:***:***

GCPII     451 NADSSIEGNYTLRVDCTPLMYSLVHNLTKELKSPDEGFEGKSLYESWTKK
GCP3     440 NSDSSIEGNYTLRVDCTPLLYQLVYKLTKEIPSPDDGFESKSLYESWLEK
      *:*****:*****.***:***:***:***:***.***** :*

GCPII     501 SPSPEFSGMPRISKLGSGNDFEVFFQRLGIASGRARYTKNWETNKFSGYP
GCP3     490 DPSPENKNLPRINKLGSGSDFEAYFQRLGIASGRARYTKNKKTDKYSSYP
      .****. :*:***.***. :*:*****:***** :*:***.

GCPII     551 LYHSVYETYELVEKFYDPMFKYHLTVAQVRGGMVFELANSIVLPFDCRDY
GCP3     540 VYHTIYETFELVEKFYDPTFKKQLSVAQLRGALVYELVDSKIIPFNIQDY
      :*:***:***** ** :*:***:*. :*:***:*. :*:***:

GCPII     601 AVVLRKYADKIYSISMKHPQEMKTYSVSFDLSFSAVKNFTEIASKFSERL
GCP3     590 AEALKNYAASIYNLSKKHDQQLTDHGVSFDSLSFSAVKNFSEASDFHKRL
      * .*:***.***:*. ** *:.. :*****:***.* :*. :**

GCPII     651 QDFDKSNPIVLRMMNDQLMFLERAFIDPLGLPDRPFYRHVIYAPSSH●●NKY
GCP3     640 IQVDLNNPIAVRMMNDQLMLLERAFIDPLGLPGKLFYRHIIFAPSSH●●NKY
      :.* .***. :*****:*****:*****:*****:***:***:

GCPII     701 AGESFPGIYDALFDIESKVDPSKAWGEVQRQIYVAAFTVQAAAETLSEVA
GCP3     690 AGESFPGIYDAIFDIENKANSRLAWKEVKKHISIAAFTIQAAAGTLKEVL
      *****:*****.***. ** ***:*. :*:***:*** **.*

```

## Supporting Materials and Methods

### Supporting Scheme 1

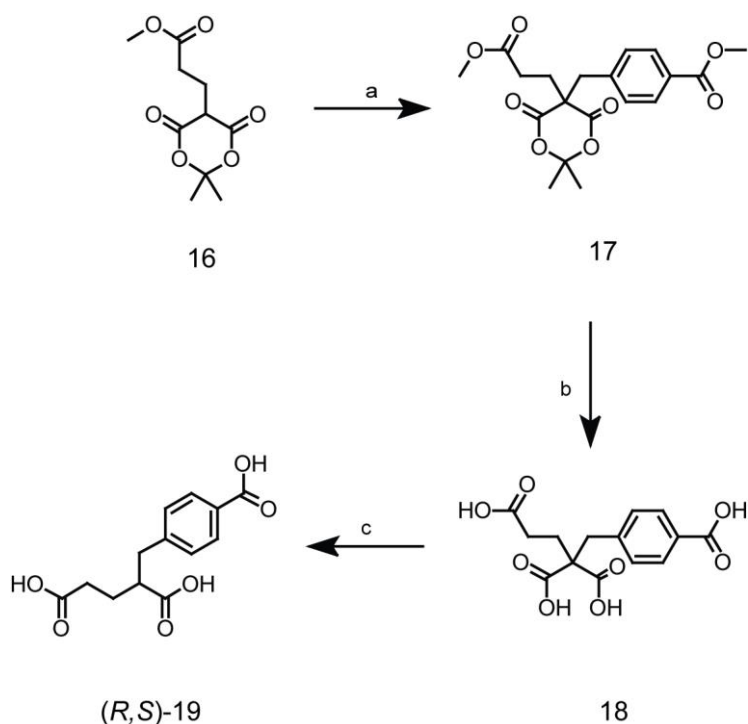

#### Methyl 4-((5-(3-methoxy-3-oxopropyl)-2,2-dimethyl-4,6-dioxo-1,3-dioxan-5-yl)methyl)benzoate; 17

To a solution of methyl 3-(2,2-dimethyl-4,6-dioxo-1,3-dioxan-5-yl)propanoate (226 mg, 1.0 mmol) in acetonitrile (3ml) benzyltriethylammoniumchlorid (228 mg, 1.0 mmol), methyl-4-bromomethylbenzoate (275mg, 1.2 mmol) and potassium carbonate (138 mg, 1.0 mmol) were added respectively and the mixture was stirred at room temperature under the nitrogen atmosphere for 2 h. Volatiles were removed *in vacuo*, the residue was dissolved in ethyl acetate (25 ml), and washed with 10% aq.  $\text{KHSO}_4$  (2x), sat.  $\text{NaHCO}_3$  (2x) and brine (1x), the organic layer was dried over anhydrous  $\text{MgSO}_4$ . Solvent was removed *in vacuo* and the residue was chromatographed on silica gel (hexane – ethyl acetate 3:1) to afford 189 mg (50 %) as a white amorphous solid.

$^1\text{H NMR}$  (400 MHz,  $\text{CDCl}_3$ ): 0.71 (3H, s), 1.60 (3H, s), 2.38 – 2.41 (2H, m), 2.48 – 2.51 (2H, m), 3.38 (3H, s), 3.68 (3H, s), 3.89 (3H, s), 7.25 – 7.27 (2H, m), 7.93 – 7.95 (2H, m).

$^{13}\text{C NMR}$  (101 MHz,  $\text{CDCl}_3$ ): 29.24, 29.33, 29.83, 35.41, 43.25, 52.18, 52.37, 56.09, 106.28, 129.82, 130.18, 130.67, 140.17, 166.17, 168.26 (2C), 171.69.

**ESI MS:** 401 ( $[\text{M} + \text{Na}]^+$ ).

**HR ESI MS:** calcd for  $\text{C}_{19}\text{H}_{22}\text{O}_8\text{Na}$  401.12069; found 401.12074.

#### **4-(4-carboxyphenyl)butane-1,3,3-tricarboxylic acid; 18**

To a solution of methyl 4-((5-(3-methoxy-3-oxopropyl)-2,2-dimethyl-4,6-dioxo-1,3-dioxan-5-yl)methyl)benzoate (188mg, 0.5 mmol) in dioxane (3ml) was added NaOH (200 mg dissolved in minimal amount of water). The mixture was heated to 50°C for 5 h. After this period dioxane was evaporated and pH was acidified by 10% aq. KHSO<sub>4</sub>. The aqueous phase was extracted with ethyl acetate (3 x 8 ml). Combined organic portions were dried over anhydrous MgSO<sub>4</sub>, evaporated and the product was used in the next step without further purification.

#### **2-(4-carboxybenzyl)pentanedioic acid; (R,S)-19**

The solution of 4-(4-carboxyphenyl)butane-1,3,3-tricarboxylic acid (155 mg, 0.5 mmol) in DMSO (2 ml) was heated to 130°C for 5 h. The volatiles were removed *in vacuo* and the final product was purified on reverse phase column YMC (C18, 250x20mm) using a preparative HPLC system (pumps PU-986 (Jasco), UV detector UV-975 (Jasco) set at 230 nm, PC workstation with Clarity software (Dataapex)). Gradient 15-50% ACN in 60 min. with flow rate 10 ml/min.

<sup>1</sup>H NMR (400 MHz, DMSO): 1.63 – 1.76 (2H, m), 2.17 – 2.31 (2H, m), 2.59 – 2.66 (1H, m), 2.77 – 2.82 (1H, m), 2.86 – 2.92 (1H, m), 7.31 (2H, d, *J* = 8.3), 7.85 (2H, d, *J* = 8.3), 12.41 (3H, s).

<sup>13</sup>C NMR (101 MHz, DMSO): 26.71, 31.38, 37.37, 45.61, 128.79, 129.04, 129.31, 144.71, 167.24, 173.86, 175.64.

ESI MS: 265 ([M - H]<sup>-</sup>).

HR ESI MS: calcd for C<sub>13</sub>H<sub>13</sub>O<sub>6</sub> 265.07176; found 265.07126.

#### REFERENCES

1. Alquicer, G.; Sedlak, D.; Byun, Y.; Pavlicek, J.; Stathis, M.; Rojas, C.; Slusher, B.; Pomper, M. G.; Bartunek, P.; Barinka, C. Development of a high-throughput fluorescence polarization assay to identify novel ligands of glutamate carboxypeptidase II. *J Biomol Screen* **2012**, 17, 1030-1040.
